# Supplementary material
Source: PubMed Central journal article supplement (PMC3141089)
Supplement: NIHMS305253-supplement-1.pdf [file NIHMS305253-supplement-1.pdf]

## Online Supplement for

Relaxin ameliorates hypertension and increases NO metabolite excretion in Angiotensin II but not L-NAME hypertensive rats

Jennifer M Sasser<sup>1</sup>, Miklos Molnar<sup>1,3</sup>, and Chris Baylis<sup>1,2</sup>

Running Title: Antihypertensive effects of relaxin depend on NO

Departments of <sup>1</sup>Physiology and Functional Genomics and <sup>2</sup>Medicine, University of Florida and <sup>3</sup>Department of Pathophysiology, Semmelweis University, Budapest, Hungary.

Figure S1.

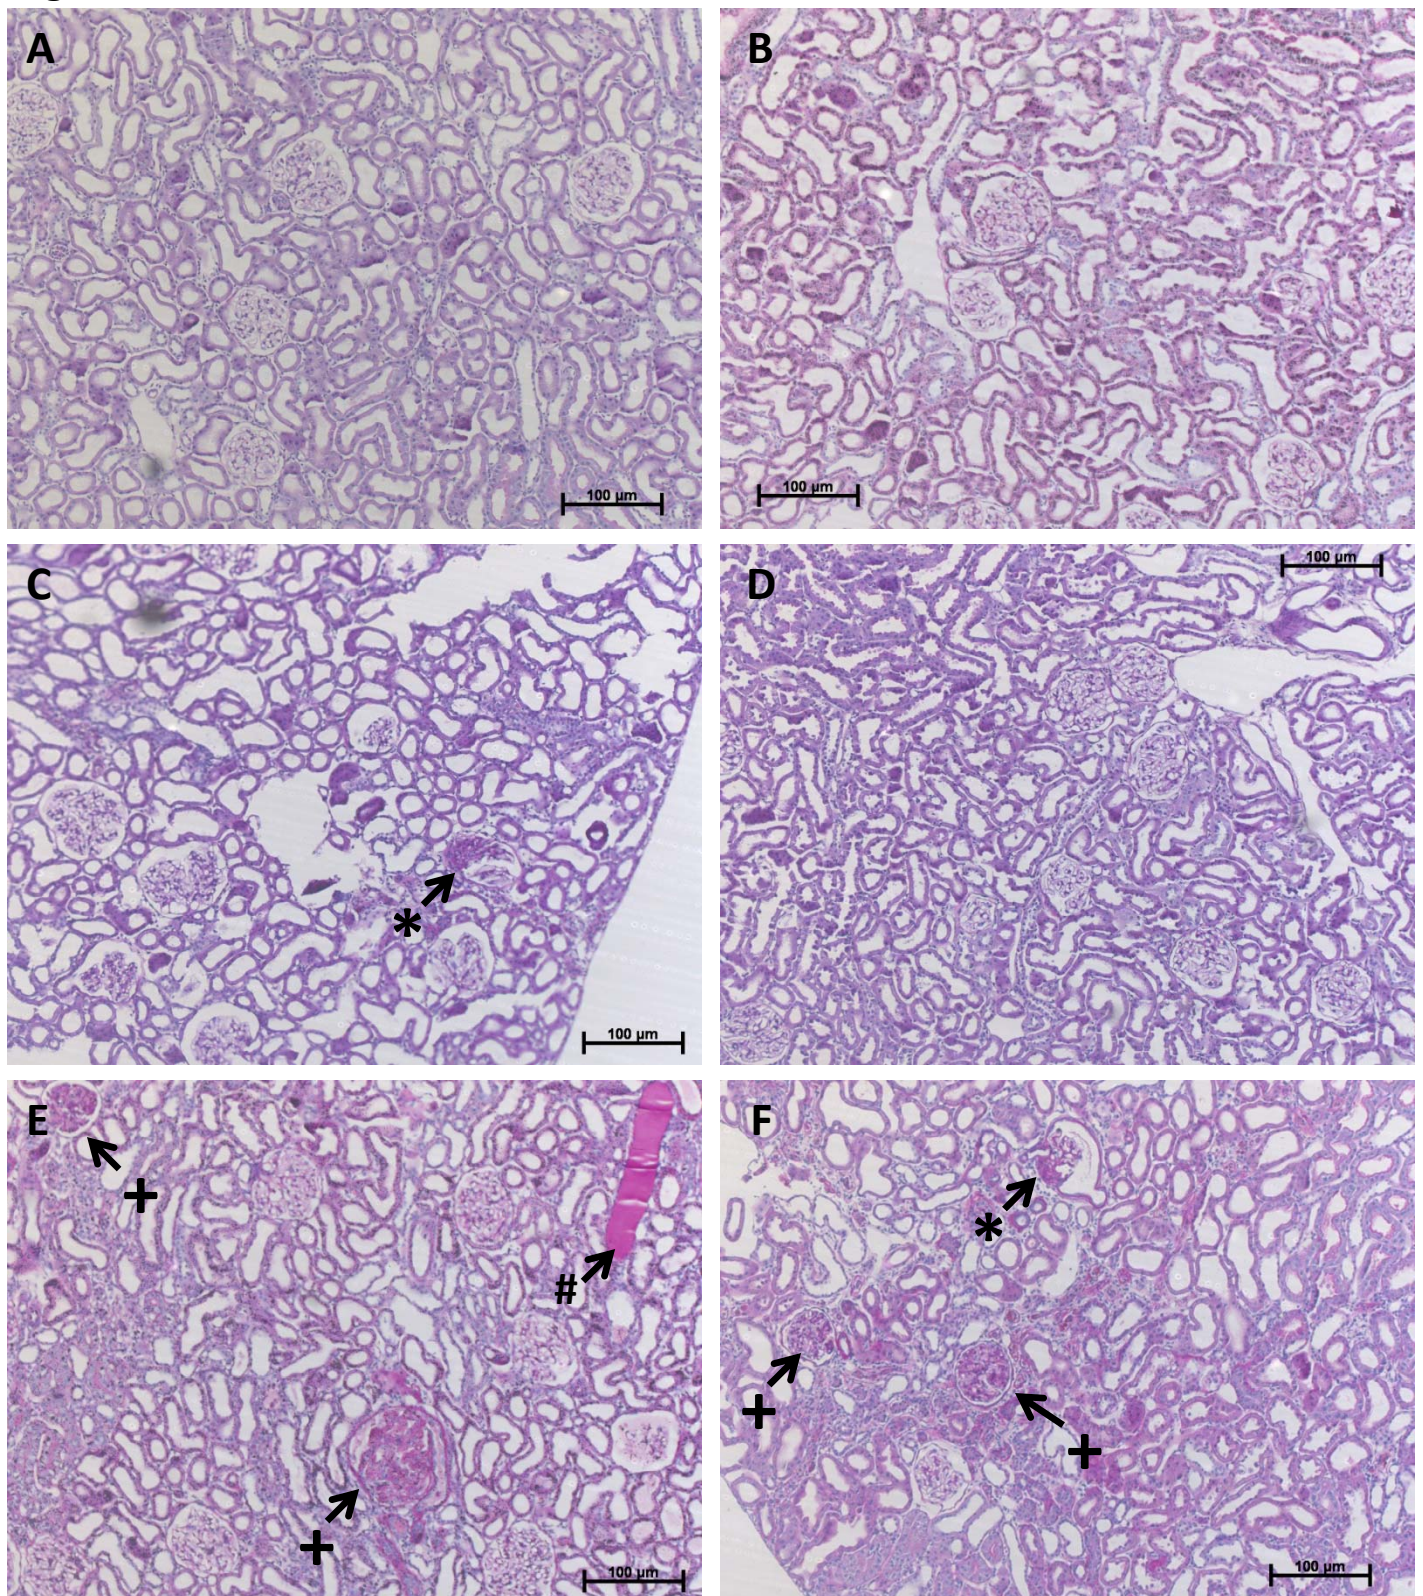

Supplemental Figure 1. Representative images of renal histology in Periodic Acid-Schiff stained sections from Control (A), Relaxin (B), ANGII (C), ANGII + Relaxin (D), L-NAME (E), and L-NAME + Relaxin (F) treated rats. \* indicates focal segmental glomerular sclerosis, # indicates protein cast, + indicates global glomerular sclerosis. No remarkable histological changes were observed in slides from Control (A), Relaxin (B), or ANGII + Relaxin (D) treated rats, and sections from each group showed many undamaged glomeruli. Original magnification = 10X.
